# Supplementary material
Source: MDPI journal article supplement (https://www.mdpi.com/2071-1050/13/16/9397)

## Supplementary S1:

### Basic structural model

In STM, each speech can belong to a mixture of  $k$  topics. Topic proportions,  $\theta_k$ , are allowed to correlate. Covariates are allowed to impact topical prevalence. The topical content covariate, party side in our case, allows term use within a topic to vary by content.

Let us assume that we have a corpus of  $A$  speeches, each of them indexed as  $a_i \in (1, \dots, A)$ . Every parliamentary speech contains  $n$  observed terms. These are indexed as  $n \in (1, \dots, N_a)$ . Each term, denoted by  $v \in (1, \dots, V)$ , is part of the general vocabulary of the speech corpus. A term in the vocabulary is denoted by  $w_{a,n}$ . The number of topics,  $k \in (1, \dots, K)$ , is the most important input variable, which is drawn from a distribution. This distribution is affected by topic prevalence covariates (coalitions), which are specified in a  $p \times 1$  vector  $X_a$  that contains party coalition information affecting the dominance of a topic  $k_i$  for each speech  $a_i$ .

We describe the process: First, the speech-level relation to each topic  $k$  is drawn from a logistic normal generalised linear model:

$$\vec{\theta}_a | X_{a\gamma} \sim \text{LogisticNormal}_{K-1}(\mu X_{a\gamma}, \Sigma), \quad (1)$$

where  $\gamma$  is a  $P \times (K - 1)$  matrix of coefficients for the topic prevalence model drawn from a normal distribution for each  $k$  ( $k = 1 \dots K - 1$ ) with the other  $K - 1$  topics to provide bivariate dependence between topics.  $\Sigma$  is a  $(K - 1) \times (K - 1)$  covariance matrix. In the next step, a topic-specific deviation from the first stage  $\kappa_k$ , a covariate for group deviation  $\kappa_g$  and an interaction term  $\kappa_i$  between them, using the speech-specific distribution over terms initially attributed to each topic ( $k$ ) by the log frequency distribution ( $m$ ) of the vocabulary vector, can be written as

$$\beta_{a,k,v} \propto \exp(m + \kappa_{k,v} + \kappa_{g,v} + \kappa_{i=k,g_a,v}), \quad (2)$$

where  $m$ ,  $\kappa_{k,v}$ ,  $\kappa_{g,v}$  and  $\kappa_i$  are vectors of length  $V$  that contain one input per term in the vocabulary.

Third, for each term  $n \in (1, \dots, N_a)$  in a speech  $a_i$ , the term specific topic assignment  $z_{a,n}$  is modeled based on the speech-specific distribution over the given finite set of topics:

$$z_{a,n} | \vec{\theta}_\gamma \sim \text{Multinomial}_K(\vec{\theta}_\gamma), \quad (3)$$

The probability of an observed term to be attributed in this topic is then given by:

$$w_{a,n} | z_{a,n}, \beta_{a,k} = Z_{a,n} \sim \text{Multinomial}(\beta_{a,k} = Z_{a,n}). \quad (4)$$

The model then is fit using the partially collapsed variational Expectation-Maximisation algorithm that uses a Laplace approximation to the non-conjugate portion of the model.

## Supplementary S2

Figure S1. Scatterplots of log probabilities of sustainability terms by selected topic.

### Petroleum

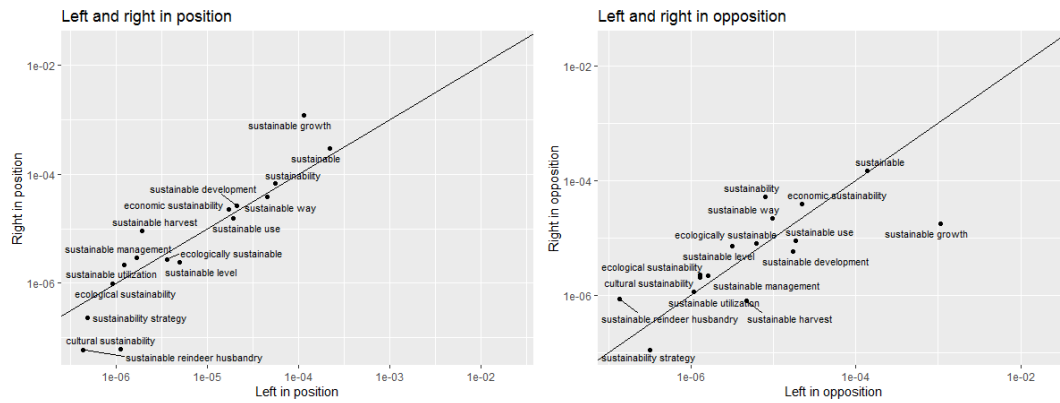

### EU

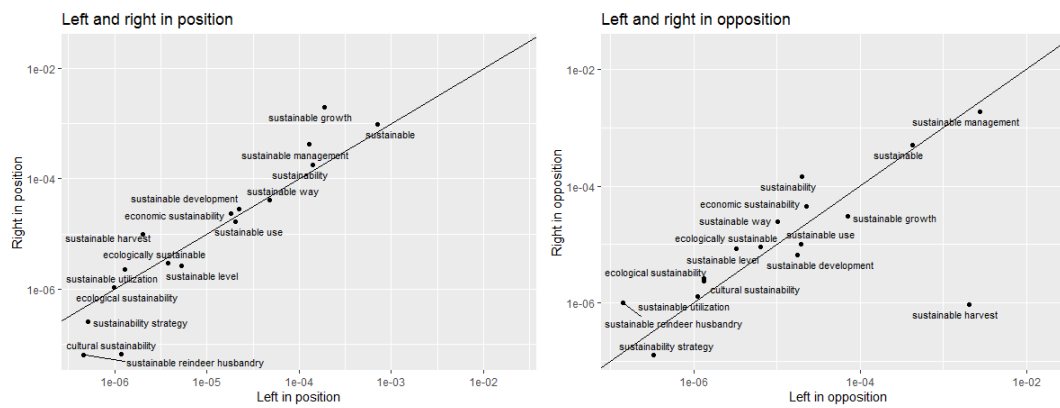

### Svalbard

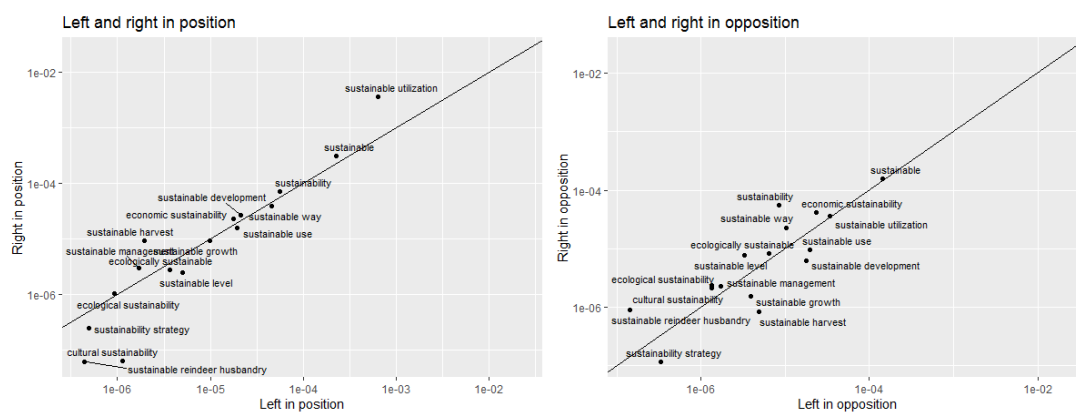

Supplement: s1 [file s1]
